# Supplementary material for: Suicide and self-harm in low- and middle- income countries during the COVID-19 pandemic: A systematic review
Source: PLOS Glob Public Health. 2022 Jun 1;2(6):e0000282. doi: 10.1371/journal.pgph.0000282 (PMC10021274; doi:10.1371/journal.pgph.0000282)
Supplement: S1 Data — (XLSX) [file pgph.0000282.s004.xlsx]

## Sheet: Sheet1
Author (year)	Design	Cohort											Cross-sectional								Before & After									Time series						Case series
		1.Were the two groups similar and recruited from the same population?	2.Were the exposures measured similarly to assign people to both exposed and unexposed groups?	3.Was the exposure measured in a valid and reliable way?	4.Were confounding factors identified?	5.Were strategies to deal with confounding factors stated?	6.Were the groups/participants free of the outcome at the start of the study (or at the moment of exposure)?	7.Were the outcomes measured in a valid and reliable way? (unclear when they were measured)	8.Was the follow up time reported and sufficient to be long enough for outcomes to occur?	9.Was follow up complete, and if not, were the reasons to loss to follow up described and explored?	10. Were strategies to address incomplete follow up utilized?	11. Was appropriate statistical analysis used?	1.Were the criteria for inclusion in the sample clearly defined?	2.Were the study subjects and the setting described in detail?	3.Was the exposure measured in a valid and reliable way?	4.Were objective, standard criteria used for measurement of the condition?	5.Were confounding factors identified?	6.Were strategies to deal with confounding factors stated?	7.Were the outcomes measured in a valid and reliable way?	8.Was appropriate statistical analysis used?	1. Was the study question or objective clearly stated?	2. Were eligibility/selection criteria for the study population prespecified and clearly described?	3. Were all eligible participants that met the prespecified entry criteria enrolled?	4. Was the sample size sufficiently large to provide confidence in the findings? (i.e. were there at least 100 cases in the pre and post COVID period?)	5. Was the test/service/intervention clearly described? (i.e. was the incidence or public health measures put in place to prevent spread provided in sufficient detail?)	6. Were the outcome measures prespecified, clearly defined, valid, and reliable?	7. Was the same approach/data source used for the pre-covid measures of suicidal behaviour as the those collected during the pandemic period?	8. Was there any evidence of differences in missing data pre and during the pandemic period?	9. Did the statistical methods examine changes in outcome measures from before to after the intervention? Were statistical tests done that provided p values for the pre-to-post changes?	1. Intervention independent of other changes	2. Intervention unlikely to affect data collection	3. Knowledge of the allocated interventions adequately prevented during the study1,2	4. Incomplete outcome data	5. Selective outcome reporting	6. Other risks of bias	1. Were there clear criteria for inclusion in the case series?	2. Was the condition measured in a standard, reliable way for all participants included in the case series?	3. Were valid methods used for identification of the condition for all participants included in the case series?	4. Did the case series have consecutive inclusion of participants?	5. Did the case series have complete inclusion of participants?	6. Was there clear reporting of the demographics of the participants in the study?	7. Was there clear reporting of clinical information of the participants?	8. Were the outcomes or follow up results of cases clearly reported?	9. Was there clear reporting of the presenting site(s)/clinic(s) demographic information?	10. Was statistical analysis appropriate?
Thongchuam (2021) (17)	Before & after																				Yes	Yes	No/Other	No/Other	No/Other	No/Other	No/Other	No/Other	Yes
Zheng (2021) (21)	Before & after																				Yes	No/Other	Yes	Yes	Yes	Yes	Yes	Yes	Yes
Ketphan (2020) (22)	Before & after																				No/Other	No/Other	No/Other	No/Other	No/Other	No/Other	No/Other	No/Other	No/Other
Zhang (2020) (20)	Before & after																				Yes	Yes	No/Other	No/Other	Yes	Yes	Yes	No/Other	No/Other
Fidanci (2021) (24)	Before & after																				Yes	Yes	Yes	No/Other	Yes	Yes	Yes	No/Other	Yes
Eray (2021) (23)	Before & after																				Yes	Yes	Yes	No/Other	Yes	No/Other	No/Other	No/Other	Yes
Gerasimova (2020) (25)	Before & after																				Yes	Yes	No/Other	No/Other	No/Other	No/Other	No/Other	No/Other	No/Other
Acharya (2020) (31)	Before & after																				Yes	Yes	Yes	No/Other	No/Other	Yes	Yes	No/Other	No/Other
Jhanwar (2020) (33)	Before & after																				Yes	Yes	Yes	No/Other	Yes	Yes	Yes	No/Other	Yes
Shrestha (2021) (37)	Before & after																				Yes	Yes	Yes	No/Other	Yes	Yes	Yes	No/Other	No/Other
Sengupta (2020) (36)	Before & after																				Yes	Yes	No/Other	No/Other	No/Other	Yes	Yes	No/Other	No/Other
Behara (2021) (32)	Before & after																				Yes	Yes	Yes	No/Other	Yes	Yes	Yes	No/Other	Yes
Poudel (2020) (12)	Before & after																				No/Other	No/Other	No/Other	Yes	Yes	Yes	No/Other	No/Other	No/Other
Forouzanfar (2021) (29)	Case series																																			Yes	No/Unclear/NA	No/Unclear/NA	Yes	No/Unclear/NA	Yes	No/Unclear/NA	No/Unclear/NA	No/Unclear/NA	No/Unclear/NA
Pirnia (2020) (30)	Case series																																			Yes	No/Unclear/NA	Yes	Yes	No/Unclear/NA	No/Unclear/NA	No/Unclear/NA	No/Unclear/NA	No/Unclear/NA	No/Unclear/NA
Sahoo (2020) (35)	Case series																																			No/Unclear/NA	No/Unclear/NA	No/Unclear/NA	No/Unclear/NA	No/Unclear/NA	No/Unclear/NA	No/Unclear/NA	No/Unclear/NA	No/Unclear/NA	No/Unclear/NA
Mei (2021) (16)	Cohort	No/Unclear/NA	Yes	No/Unclear/NA	Yes	Yes	No/Unclear/NA	No/Unclear/NA	Yes	No/Unclear/NA	No/Unclear/NA	Yes
Tong (2021) (18)	Cross-sectional												Yes	Yes	No/Unclear/NA	No/Unclear/NA	Yes	Yes	Yes	Yes
Xu (2021) (19)	Cross-sectional												Yes	Yes	No/Unclear/NA	Yes	Yes	No/Unclear/NA	Yes	Yes
Teksin (2020) (26)	Cross-sectional												No/Unclear/NA	No/Unclear/NA	No/Unclear/NA	Yes	No/Unclear/NA	No/Unclear/NA	Yes	Yes
Pirkis (2021) - Russia	Time series																													Low risk	Unclear risk	Low risk	Low risk	Low risk	Low risk
Pirkis (2021) - Brazil	Time series																													Low risk	Unclear risk	Low risk	Low risk	Low risk	Low risk
Pirkis (2021) - Ecuador	Time series																													Low risk	Unclear risk	Low risk	High risk	Low risk	Low risk
Pirkis (2021) - Mexico	Time series																													Low risk	Unclear risk	Low risk	High risk	Low risk	Low risk
Pirkis (2021) - Peru	Time series																													Low risk	Unclear risk	Low risk	Low risk	Low risk	Low risk
Knipe (2021) (34)	Time series																													Low risk	Low risk	Low risk	Low risk	Low risk	Low risk
